ANDHRA PRADESH DISABILITY STUDY 2014  
Case Control Questionnaire

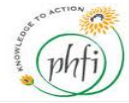

COVER SHEET

1 Cluster No.  2 House No.  3 Subject ID No.

4 Subject Name: \_\_\_\_\_

5 Interviewer No.  6 Date (Day/Month/Year): \_\_\_/\_\_\_/\_\_\_

7 Language of Interview:

- 1 = Telegu
- 2 = Urdu
- 3 = English

8 Is study subject a case or control?

- 1 = Case (Person with a disability)
- 2 = Control

9 What is the study subject's age (years)?

10 What is the study subject's gender (observe)

- 1 = male
- 2 = female

11 Is the study subject the head of the household 0 = No

1 = Yes

12 Is there another person in this household who has already been interviewed?

0 = No → **if NO, GO TO Q14**

1 = Yes

13 If yes, what is that person's ID no (check participant card)

14 Person interviewed:

- 1 = Direct interview with case/control
- 2 = Interview with proxy only
- 3 = Interview with proxy and case/control together

ID of proxy respondent:

ID of proxy respondent:

**A SOCIO-ECONOMIC QUESTIONS**

**I would first like to check your height and your weight.**

**1. Interviewer fill in:**

- 1= Weight Measured
- 2= Weight not measured (wheelchair)
- 3= Weight not measured (other reason)
- Specify \_\_\_\_\_

2 Weight in Kilograms

**3. Interviewer fill in:**

- 1= Height measured standing
- 2= Height measured lying down
- 3= Height not measured
- Reason \_\_\_\_\_

4 Height in Centimetres

***I am now going to ask you a few questions about your household***

Note to Interviewer: If there is more than one case or control in the household, this section should be asked to the first person interviewed ONLY

1 How many rooms are there in your household (excluding bathrooms, kitchens, balconies and corridors)?

 

2 What is the main source of lighting in your household?

- 1 = Mains power
- 2 = Generator/battery/inverter
- 3 = Kerosene/oil/petrol lamps
- 4 = Candles
- 5 = No lighting
- 6 = Other, specify:

\_\_\_\_\_

3 Does any member of your household own the following (in working order):

|                           | 0 = No | 1 = Yes |
|---------------------------|--------|---------|
| a Radio/HiFi/Stereo       | 0      | 1       |
| b TV/VCR/DVD              | 0      | 1       |
| c Fridge/Freezer          | 0      | 1       |
| d mobile phone            | 0      | 1       |
| e Cupboard                | 0      | 1       |
| f Sofa set/armchair       | 0      | 1       |
| g Table                   | 0      | 1       |
| h Motor vehicle incl cars | 0      | 1       |
| i Motorbike               | 0      | 1       |

|                       | 0 = No | 1 = Yes |
|-----------------------|--------|---------|
| j Washing machine     | 0      | 1       |
| k Sewing machine      | 0      | 1       |
| l Air conditioner     | 0      | 1       |
| m bicycle             | 0      | 1       |
| n Stove with gas      | 0      | 1       |
| o Stove with electric | 0      | 1       |
| p Computer            | 0      | 1       |
| q Kerosene Gas Stove  | 0      | 1       |
| r wooden stove        | 0      | 1       |

4 What is the ownership of your household's dwelling?

- 1= House owned by household
- 2= Rented house
- 3= Government owned house
- 4= Other, specify:

\_\_\_\_\_

**B. Water and Sanitation**

**I would now like to ask you a few questions about water and sanitation:**

Note to Interviewer: Questions 1,2, 7, 8 and 9 should only be answered once for each household. If there is more than one case or control in the household, this section should be asked to the first person interviewed ONLY

- 1 What kind of toilet facilities do members of your household usually use
- 1 = Flush toilet  
2 = Traditional latrine  
3 = Ventilation improved pit latrine  
4 = Bowl/ Bucket  
5 = Other, Specify: \_\_\_\_\_  
6 = No toilet → **IF NO TOILET GO TO Q7**
- 2 Do you share this facility with other households?
- 1 = Used only by your household  
2 = Shared with other households  
3 = Public/ Communal/ Community Latrine
- 3 Do you use the same toilet facility as other members of your household?
- 0 = No  
1 = Yes → **If YES, go to Q6**
- 4 Why do you use a different toilet facility from other members of your household (main reason)
- 1 = It would be physically impossible  
2 = I'm not allowed/others would not like it  
3 = I might face verbal or physical abuse  
4 = I would be embarrassed  
5 = Other (specify) \_\_\_\_\_
- 5 What kind of toilet facility do you usually use?
- 1 = Flush toilet  
2 = Traditional latrine  
3 = Ventilation improved pit latrine  
4 = Bowl/ Bucket  
5 = Other, Specify:  
6 = No toilet
- 6 Are you usually able to use the toilet facility without you or your clothes coming into contact with faeces
- 0 = No  
1 = Yes
- 7 What is the main source of drinking water for members of your household?
- 1 = Private pipeline  
2 = Private well  
3 = Public taps/standpipe  
4 = Public well  
5 = Neighbours  
6 = Water vendor  
7 = Spring  
8 = River/stream/lake  
9 = Rainwater  
10 = Other, specify:
- 8 How long does it take to go there, get water and come back?
- minutes
- 9 Where do members of your household normally bath?
- 1 = Surface water (eg. Pond, river, sea)  
2 = Pump or standpipe stored outside compound  
3 = Piped or stored water inside the house or compound
- 10 Do you collect water for drinking?
- 0 = No → **If NO, go to Q15**  
1 = Yes
- 11 Do you collect drinking water from the same source as other members of your household?
- 0 = No  
1 = Yes → **If YES, go to Q17**
- 12 How long does it take to go there, get water and come back?
- minutes
- 13 From what source do you usually collect drinking water?
- 1 = Private pipeline  
2 = Private hand pump/tap  
3 = Private well  
4 = Public handpump/tap  
5 = Public well  
6 = Neighbours  
7 = Water vendor  
8 = Spring  
9 = River/stream/lake  
10 = Rainwater  
11 = Other, specify:

14 Is this the same source as the water you use for bathing?

0= No  
1 = Yes

15 Could you collect water from the same source used by other members of your household?

0 = No  
1 = Yes → **If YES, go to Q17**

16 If no, why not?

1 = It would be physically impossible  
2 = I'm not allowed/others would not like it  
3 = I might face verbal or physical abuse  
4 = I would be embarrassed  
5 = Other (specify)

17 Are you able to access drinking water at home without assistance?

0 = No  
1 = Yes

18 Have you had diarrhoea (4 or more loose stools within 24 hours) anytime in the past four weeks?

0 = No  
1 = Yes



**D. Education questions (CASES/CONTROLS AGED 17 YEARS AND BELOW ONLY)**

Note to interviewer: If answered by proxy replace "are you" with "is [name]"

- 1 Are you currently enrolled in school? 0 = No → **If NO, go to Q7**  
1 = Yes
- 2 Are you enrolled in the same grade as other children your age? 1 = Yes  
2= No, lower grade than other children my age  
3= No, a higher grade than other children my age
- 3 Is the school you are in a mainstream/regular school or special school? 1 = Mainstream/regular  
2 = Special school  
3 = Integrated  
4 Mainstream with special/extra classes
- 4 In the last month of school, how many days did you miss?   days
- 5 Have you ever repeated a grade at school 0 = No → **If NO, go to Q11**  
1 = Yes
- 6 If yes, how many times have you repeated a grade at school  → **Go to Q11**
- 7 If not currently enrolled, have you ever attended school? 0 = No → **If NO, go to Q10**  
1 = Yes
- 8 What is the highest level of education you completed 1 = Primary  
2 = Secondary  
3 = High School  
4 = University  
5= Religious School
- 9 What was the highest grade that you completed?
- 10 If you have never attended/are currently not attending school, what is the main reason?  
1 = Not enough money  
2 = Lack of interest to go to school  
3 = Lack of school nearby  
4 = Nearby school not accessible  
5 = Illness (<1 month)  
6 = Illness (> 1 month)  
7 =Attendance refused by school  
8 = Negative attitudes of other students  
9 = Negative attitudes of teachers  
10 = Lack of accessible resources to assist child  
11 = Child works  
12= Other, Specify: \_\_\_\_\_

**Go to Section F**

**CASES AND CONTROLS (5-17) CURRENTLY ENROLLED IN SCHOOL ONLY**

11 If you currently attend school, how often do the following situations happen to you?

|                                                                           | Always | Sometimes | Never | Dont Know |
|---------------------------------------------------------------------------|--------|-----------|-------|-----------|
| A. If you have a problem at school there are teachers willing to help you | 1      | 2         | 3     | 4         |
| B. If you have a problem at school there are friends to help you          | 1      | 2         | 3     | 4         |
| C. If your friends have a problem at school they come to you for help     | 1      | 2         | 3     | 4         |
| D. You have friends that you play with at breaktimes                      | 1      | 2         | 3     | 4         |
| E. Your friends look up to you as a leader                                | 1      | 2         | 3     | 4         |
| F. Children hit, hurt or say nasty things to you                          | 1      | 2         | 3     | 4         |
| G. Teachers hit, hurt or say nasty things to you                          | 1      | 2         | 3     | 4         |
| H. You are included in lessons and school activities                      | 1      | 2         | 3     | 4         |
| I. Your school has the right materials to help you learn                  | 1      | 2         | 3     | 4         |

**If CONTROL go to Section F  
If CASE continue to next page**

**CASES (5-17) CURRENTLY ENROLLED IN SCHOOL ONLY**

12 I want to know more about your school and whether it is adapted for your needs

|                                                          | Yes | No | Not Applicable |
|----------------------------------------------------------|-----|----|----------------|
| A. Do you get extra time to complete work or tests       | 1   | 2  | 3              |
| B. Does the teacher teach in a way that makes it easy    | 1   | 2  | 3              |
| C. Do you get extra lessons?                             | 1   | 2  | 3              |
| D. Are teaching aids adapted for you eg. Are pictures    | 1   | 2  | 3              |
| E. Does another person in the classroom help you?        | 1   | 2  | 3              |
| F. Is the class environment adapted for you eg.          | 1   | 2  | 3              |
| G. Are communication devices used to help you eg.        | 1   | 2  | 3              |
| H. Is text put in Braille or large font, or audio taped? | 1   | 2  | 3              |
| I. Are hearing or visual aids used                       | 1   | 2  | 3              |
| J. Does someone use sign language with you?              | 1   | 2  | 3              |
| K. Is the playground accessible?                         | 1   | 2  | 3              |
| L. Is there an accessible toilet?                        | 1   | 2  | 3              |

13 At school are you able to use the same toilet facility as other pupils?

0 = No  
1 = Yes → **If YES, go to Q15**

14 If no, what is the main reason why not?

1 = It would be physically impossible  
2 = I could not use it without getting myself or my clothes soiled  
3 = I'm not allowed/others would not like it  
4 = I might face verbal or physical abuse  
5 = I would be embarrassed  
6 = Other (specify) \_\_\_\_\_

15 At school are you able to access drinking water from the same source as other pupils?

0 = No  
1 = Yes → **If YES, go to Q17**

16 If no, what is the main reason why not?

1 = It would be physically impossible  
2 = I'm not allowed/others would not like it  
3 = I might face verbal or physical abuse  
4 = I would be embarrassed  
5 = Other (specify) \_\_\_\_\_

17 At school are you able to wash your hands at the same place as other pupils?

0 = No  
1 = Yes → **If YES, GO TO Section F**

18 If no, what is the main reason why not?

1 = It would be physically impossible  
2 = I'm not allowed/others would not like it  
3 = I might face verbal or physical abuse  
4 = I would be embarrassed  
5 = Other (specify)

**GO TO Section F**

**E Livelihood questions (CASES/CONTROLS AGED 18 YEARS AND ABOVE ONLY)**

*I would now like to ask you some questions about work*

1 Other than domestic work in the household  
Have you done any work in the last seven days? 0 = No  
1 = Yes → If YES, Go to Q4

2 Although you did not work in the last seven days,  
do you have any job or business from which you were  
absent for leave, illness, vacation, or any other such reason? 0 = No  
1 = Yes → If YES, Go to Q4

3 Have you done any work in the last 12 months? 0 = No → If NO, go to Q8  
1 = Yes

4 What is your occupation,  
that is, what kind of work do you mainly do?  Code

5 In this work do you :  
work on your own/household's business (e.g. Shopkeeper, taxi driver, carpenter, barber) or  
work for someone who is not a member of your household (e.g. enterprise, company, government/other individual) or  
work on farm owned/rented by yourself or household member

- 1 = own/household business
- 2 = non-household member
- 3 = farm owned/rented by household

6 Do you usually work throughout the year,  
or do you work seasonally, or only once in a while? 1= Throughout the year  
2 = Seasonally/part of the year  
3 = Once in a while

7 Are you paid in cash or kind for this work or are you  
not paid at all? 1 = Cash only  
2 = Cash and kind  
3 = In kind only  
4 = Not paid

} Go to Q9

8 If not working, what is the main reason ?

- 1= Student
- 2= Childcare/duties/work inside the house
- 3= Too old / retired
- 4= Incapable of working, physically
- 5= Incapable of working, mentally
- 6= Nobody would give me a job because I am disabled
- 7= Long illness (>1 month)
- 8= I am looking for my first job
- 9= No jobs opportunities in the area
- 10= Quit/suspended from job
- 11= Other (please specify): .....

9 Do you receive any of the following benefits

10 AD Are you involved in any of the following

|                             | Yes | No | If yes, from |          |
|-----------------------------|-----|----|--------------|----------|
|                             |     |    | Govt         | Non Govt |
| A. Social security grant    | 1   | 0  | 1            | 2        |
| B. Disability grant         | 1   | 0  | 1            | 2        |
| C. Pension                  | 1   | 0  | 1            | 2        |
| D. Family Allowance         | 1   | 0  | 1            | 2        |
| E. Other (specify)<br>..... | 1   | 0  | 1            | 2        |

|                             | Yes | No | If yes, run by |          |
|-----------------------------|-----|----|----------------|----------|
|                             |     |    | Govt           | Non Govt |
| A. Self Help Groups         | 1   | 0  | 1              | 2        |
| B. Microfinance Groups      | 1   | 0  | 1              | 2        |
| C. Cash for Work schemes    | 1   | 0  | 1              | 2        |
| D. Other (specify)<br>..... | 1   | 0  | 1              | 2        |

**F. HEALTH AND ANTENATAL CARE**

*These questions are about your health*

**F.1. CASES ONLY (all ages)**

Note to Interviewer: If participant screened positive via self report say:

**Your responses to our earlier questions and examinations indicate that you may have difficulties in certain areas related to your health.**

- 1 What do you think is the cause of the difficulties you face in your health? (tick all that apply)
- 1 = From Birth
  - 2 = Trauma
  - 3 = Illness
  - 4 = Aging
  - 5 = Other \_\_\_\_\_
- 2 How old were you when it started?  years
- 00 = from birth  
99 = Don't know/refused

**F2. ALL CASES AND CONTROLS**

**1. Have you ever been diagnosed by a medical doctor with any of the following? (Interviewer: Read out all options and mark all that apply)**

|                                                        | Yes | No |
|--------------------------------------------------------|-----|----|
| 1= High Blood Pressure                                 | 1   | 0  |
| 2= Diabetes                                            | 1   | 0  |
| 3= Arthritis                                           | 1   | 0  |
| 4 =Heart Disease                                       | 1   | 0  |
| 5= Asthma, asthmatic bronchitis or allergic bronchitis | 1   | 0  |
| 6= Stroke (paralytic attack)                           | 1   | 0  |
| 7= Thyroid problem                                     | 1   | 0  |
| 8=Tuberculosis                                         | 1   | 0  |

|                                                          | Yes | No |
|----------------------------------------------------------|-----|----|
| 9= COPD                                                  | 1   | 0  |
| 10= Emphysema                                            | 1   | 0  |
| 11= HIV                                                  | 1   | 0  |
| 12= Cancer<br>If yes, what type of cancer _____          | 1   | 0  |
| 13= Any other health condition?<br>If yes, specify _____ | 1   | 0  |

2 Have you had any serious health problems that have made you very sick during the last twelve months, including but not limited to those you may have mentioned above?

0 = No → **If NO, GO TO SECTION F3**  
1 = Yes

3 If yes, what type of serious health event(s) or problem(s) did you experience during this period? (tick all that apply)

- 1= Severe Diarrhea (with dehydration or for more than 14 days)
- 2= Acute respiratory tract infection/pneumonia
- 3= Malaria
- 4= Eye Infection/eye problems
- 5= Ear infection/ear or hearing problems
- 6= Malnutrition
- 7= Vaccine-preventable disease (including measles, chickenpox, mumps, rubella, tetanus, TB, whooping cough)
- 8= Chronic illness (eg. Cancer, HIV)
- 9= Accident/Injuries
- 10= Jaundice
- 11= Skin Diseases
- 12= Don't know/ no information provided
- 13= Other, specify \_\_\_\_\_

4 Where did you seek advice or treatment 1 = did not seek advice or treatment

- 2 = village/community health worker or agent
- 3= hospital
- 4= pharmacy
- 5= mobile clinic
- 6= private doctor
- 7= health centre/post (including RMPs)
- 8= traditional healer
- 9= other, specify .....

→ **If Response = 1, GO to Q5**

**All other responses go to Section F3**



**G REHABILITATION: CASES ONLY - CONTROLS GO TO SECTION I**

| <i>I am now going to ask you some questions about some services specifically for people with disabilities that you may or may not have heard of or have used now or in the past</i> |                                                                                                                  | 1.1 Have you ever heard of this type of service? | 1.2 Have you ever needed this service?        | 1.3 Have you ever received this service?  | 1.4 If yes, are you currently receiving or using it?    | 1.5 If reported needing (Yes to Q1.2) but not receiving a service (No to Q1.3), ask why have you not received it?                                                                                                                     | 1.6 If reported once receiving/using service (Yes to Q1.3) but not receiving it now (No to Q1.4), ask why are you no longer receiving it?                                                                                                                                                                                       |
|-------------------------------------------------------------------------------------------------------------------------------------------------------------------------------------|------------------------------------------------------------------------------------------------------------------|--------------------------------------------------|-----------------------------------------------|-------------------------------------------|---------------------------------------------------------|---------------------------------------------------------------------------------------------------------------------------------------------------------------------------------------------------------------------------------------|---------------------------------------------------------------------------------------------------------------------------------------------------------------------------------------------------------------------------------------------------------------------------------------------------------------------------------|
|                                                                                                                                                                                     |                                                                                                                  | 0 = No<br>(go to next service)<br><br>1 = Yes    | 0 = No<br>(go to next service)<br><br>1 = Yes | 0 = No<br>→ Q1.5<br><br>1 = Yes<br>→ Q1.4 | 0 = No<br>→ Q1.6<br><br>1 = Yes<br>(go to next service) | 1 = Too expensive<br>2 = Too far/no transport<br>3 = Discriminating<br>4 = Communication barriers<br>5 = Don't know where to access<br>6 = Service not available<br>7 = Other (specify) _____<br><b>up to three responses allowed</b> | 1 = Too expensive<br>2 = Too far/no transport<br>3 = Not longer available<br>4 = Communication/language barriers<br>5 = Don't know where to access<br>6 = Not really helping me<br>7 = Not satisfied with services<br>8 = No longer need the service<br>9 = Broken and unable to repair<br><b>up to three responses allowed</b> |
| a                                                                                                                                                                                   | <b>Medical rehabilitation</b> (e.g. physiotherapy, occupational therapy, speech and hearing therapy etc)         | 0 1                                              | 0 1                                           | 0 1                                       | 0 1                                                     |                                                                                                                                                                                                                                       |                                                                                                                                                                                                                                                                                                                                 |
| b                                                                                                                                                                                   | <b>Assistive devices service</b> (e.g. Sign language interpreter, wheelchair, hearing/visual aids, Braille etc.) | 0 1                                              | 0 1                                           | 0 1                                       | 0 1                                                     |                                                                                                                                                                                                                                       |                                                                                                                                                                                                                                                                                                                                 |
| c                                                                                                                                                                                   | <b>Specialist educational services (e.g. therapist, school support services)</b>                                 | 0 1                                              | 0 1                                           | 0 1                                       | 0 1                                                     |                                                                                                                                                                                                                                       |                                                                                                                                                                                                                                                                                                                                 |
| d                                                                                                                                                                                   | <b>Vocational Training</b> (e.g. Employment skills training, etc.)                                               | 0 1                                              | 0 1                                           | 0 1                                       | 0 1                                                     |                                                                                                                                                                                                                                       |                                                                                                                                                                                                                                                                                                                                 |
| e                                                                                                                                                                                   | <b>Counselling for person with a disability</b> (e.g. Psychologist, psychiatrist, counsellor)                    | 0 1                                              | 0 1                                           | 0 1                                       | 0 1                                                     |                                                                                                                                                                                                                                       |                                                                                                                                                                                                                                                                                                                                 |
| f                                                                                                                                                                                   | <b>Counselling for parent/family</b>                                                                             | 0 1                                              | 0 1                                           | 0 1                                       | 0 1                                                     |                                                                                                                                                                                                                                       |                                                                                                                                                                                                                                                                                                                                 |
| g                                                                                                                                                                                   | <b>Welfare services</b> (e.g. social worker, disability grant, etc)                                              | 0 1                                              | 0 1                                           | 0 1                                       | 0 1                                                     |                                                                                                                                                                                                                                       |                                                                                                                                                                                                                                                                                                                                 |
| h                                                                                                                                                                                   | <b>Health services</b> (e.g. at a primary health care clinic, hospital, home health care services etc.)          | 0 1                                              | 0 1                                           | 0 1                                       | 0 1                                                     |                                                                                                                                                                                                                                       |                                                                                                                                                                                                                                                                                                                                 |
| i                                                                                                                                                                                   | <b>Health information</b> (e.g. From the radio, tv, at schools, clinics, hospital etc.)                          | 0 1                                              | 0 1                                           | 0 1                                       | 0 1                                                     |                                                                                                                                                                                                                                       |                                                                                                                                                                                                                                                                                                                                 |
| j                                                                                                                                                                                   | <b>Traditional healer/faith healer</b>                                                                           | 0 1                                              | 0 1                                           | 0 1                                       | 0 1                                                     |                                                                                                                                                                                                                                       |                                                                                                                                                                                                                                                                                                                                 |
| k                                                                                                                                                                                   | <b>Legal advice related to having a disability</b>                                                               | 0 1                                              | 0 1                                           | 0 1                                       | 0 1                                                     |                                                                                                                                                                                                                                       |                                                                                                                                                                                                                                                                                                                                 |
| l                                                                                                                                                                                   | <b>Specialist health services</b> (e.g. Surgery, ear/eye medical, psychiatry services)                           | 0 1                                              | 0 1                                           | 0 1                                       | 0 1                                                     |                                                                                                                                                                                                                                       |                                                                                                                                                                                                                                                                                                                                 |

**H. ASSISTIVE DEVICES: CASES ONLY - CONTROLS GO TO SECTION I**

| Note to Interviewer: Read list of devices that are relevant to difficulty categories of impairment |                               | 1.1 I am going to read you a list of assistive devices. For each please tell me if you use it, need it but don't use it, or don't need it | 1.2 If used, is it in good working order? | 1.3 If used, where did you get the assistive device?                                                                                                       | 1.4 If reported, needing but not using: what is the main reason why don't you use it?                                                                                                                                                 |
|----------------------------------------------------------------------------------------------------|-------------------------------|-------------------------------------------------------------------------------------------------------------------------------------------|-------------------------------------------|------------------------------------------------------------------------------------------------------------------------------------------------------------|---------------------------------------------------------------------------------------------------------------------------------------------------------------------------------------------------------------------------------------|
| Difficulty category                                                                                | Device                        | 1 = Use it<br>2 = Need it, but don't use it -> Q 1.4<br>3 = Don't need/NA -> next device<br>4 = Don't know what it is -> Next device      | 1 = Yes<br>0 = No<br>3 = N/A              | 1 = Private provider<br>2 = Government health service<br>3 = Government service (not health)<br>4 = NGO<br>5 = Friend/relative<br>6 = Other 7 = Don't know | 1 = Not really helping me<br>2 = Not satisfied with device<br>3 = No longer need the device<br>4 = Broken and unable to repair (cost)<br>5 = Broken and unable to repair (too far)<br>6 = Broken and unable to repair (not available) |
| Seeing                                                                                             | a. Eye Glasses                |                                                                                                                                           |                                           |                                                                                                                                                            |                                                                                                                                                                                                                                       |
|                                                                                                    | b. Magnifying glass           |                                                                                                                                           |                                           |                                                                                                                                                            |                                                                                                                                                                                                                                       |
|                                                                                                    | c. Telescoping Lenses/glasses |                                                                                                                                           |                                           |                                                                                                                                                            |                                                                                                                                                                                                                                       |
|                                                                                                    | d. Enlarge print              |                                                                                                                                           |                                           |                                                                                                                                                            |                                                                                                                                                                                                                                       |
|                                                                                                    | e. Braille                    |                                                                                                                                           |                                           |                                                                                                                                                            |                                                                                                                                                                                                                                       |
|                                                                                                    | f. Other, specify<br>-----    |                                                                                                                                           |                                           |                                                                                                                                                            |                                                                                                                                                                                                                                       |
| Hearing                                                                                            | g. Hearing Aid                |                                                                                                                                           |                                           |                                                                                                                                                            |                                                                                                                                                                                                                                       |
|                                                                                                    | h. Computer                   |                                                                                                                                           |                                           |                                                                                                                                                            |                                                                                                                                                                                                                                       |
| Mobility                                                                                           | i. Wheel chair                |                                                                                                                                           |                                           |                                                                                                                                                            |                                                                                                                                                                                                                                       |
|                                                                                                    | j. Crutches                   |                                                                                                                                           |                                           |                                                                                                                                                            |                                                                                                                                                                                                                                       |
|                                                                                                    | k. Walking stick              |                                                                                                                                           |                                           |                                                                                                                                                            |                                                                                                                                                                                                                                       |
|                                                                                                    | l. White cane                 |                                                                                                                                           |                                           |                                                                                                                                                            |                                                                                                                                                                                                                                       |
|                                                                                                    | m. Guide                      |                                                                                                                                           |                                           |                                                                                                                                                            |                                                                                                                                                                                                                                       |
|                                                                                                    | n. Standing Frame             |                                                                                                                                           |                                           |                                                                                                                                                            |                                                                                                                                                                                                                                       |
|                                                                                                    | o. Other, specify<br>-----    |                                                                                                                                           |                                           |                                                                                                                                                            |                                                                                                                                                                                                                                       |

2. Do you use any other assistive devices 0 = No **→ If NO, Go to Q4**  
 1 = Yes **→ If YES, Go to Q3**

3. If yes, please tell me what they are:  if other specify \_\_\_\_\_  
 (use device list below)

4. Are there any assistive devices you think you need but do not have? 0 = No **→ If NO, go to SECTION I**  
 1 = Yes **→ If YES, Go to Q 5**

5. If yes, please tell me what they are:  if other specify \_\_\_\_\_  
 (use device list below)

DeviceList

|                   |                                                 |
|-------------------|-------------------------------------------------|
| Eyeglasses = 1    | Communication Board = 8                         |
| Hearing Aid = 2   | Braille = 9                                     |
| Wheelchair = 3    | Amplified Telephone = 10                        |
| Walking Stick = 4 | Toilet Seat Raiser = 11                         |
| White cane = 5    | Bath and shower seats = 12                      |
| Crutches = 6      | Computers and/or special computer software = 13 |
| Walking Frame = 7 | Others (specify) = 14                           |

**I. ACTIVITY LIMITATIONS AND PARTICIPATION RESTRICTIONS: ALL CASES AND CONTROLS****1 ACTIVITY LIMITATION**

I would like to know how difficult it is for you to perform this activity WITHOUT any kind of assistance at all?  
(Without the use of assistive devices - either technical or personal)

|   | No difficulty | Moderate difficulty | Severe difficulty | Unable to do | Don't Know |
|---|---------------|---------------------|-------------------|--------------|------------|
| a | 1             | 2                   | 3                 | 4            | 5          |
| b | 1             | 2                   | 3                 | 4            | 5          |
| c | 1             | 2                   | 3                 | 4            | 5          |
| d | 1             | 2                   | 3                 | 4            | 5          |
| e | 1             | 2                   | 3                 | 4            | 5          |
| f | 1             | 2                   | 3                 | 4            | 5          |
| g | 1             | 2                   | 3                 | 4            | 5          |
| h | 1             | 2                   | 3                 | 4            | 5          |
| i | 1             | 2                   | 3                 | 4            | 5          |
| j | 1             | 2                   | 3                 | 4            | 5          |
| k | 1             | 2                   | 3                 | 4            | 5          |
| l | 1             | 2                   | 3                 | 4            | 5          |
| m | 1             | 2                   | 3                 | 4            | 5          |
| n | 1             | 2                   | 3                 | 4            | 5          |
| o | 1             | 2                   | 3                 | 4            | 5          |
| p | 1             | 2                   | 3                 | 4            | 5          |
| q | 1             | 2                   | 3                 | 4            | 5          |
| r | 1             | 2                   | 3                 | 4            | 5          |

**2 PARTICIPATION RESTRICTION**

Do you have any difficulty performing this activity in your current environment? Now I would like to know whether you have difficulties even with the help of assistive devices or another person  
[Current environment where you live, work and play etc for the majority of your time]

|   | No difficulty | Moderate difficulty | Severe difficulty | Unable to do | Don't Know |
|---|---------------|---------------------|-------------------|--------------|------------|
| a | 1             | 2                   | 3                 | 4            | 5          |
| b | 1             | 2                   | 3                 | 4            | 5          |
| c | 1             | 2                   | 3                 | 4            | 5          |
| d | 1             | 2                   | 3                 | 4            | 5          |
| e | 1             | 2                   | 3                 | 4            | 5          |
| f | 1             | 2                   | 3                 | 4            | 5          |
| g | 1             | 2                   | 3                 | 4            | 5          |
| h | 1             | 2                   | 3                 | 4            | 5          |
| i | 1             | 2                   | 3                 | 4            | 5          |
| j | 1             | 2                   | 3                 | 4            | 5          |
| k | 1             | 2                   | 3                 | 4            | 5          |
| l | 1             | 2                   | 3                 | 4            | 5          |
| m | 1             | 2                   | 3                 | 4            | 5          |
| n | 1             | 2                   | 3                 | 4            | 5          |
| o | 1             | 2                   | 3                 | 4            | 5          |
| p | 1             | 2                   | 3                 | 4            | 5          |
| q | 1             | 2                   | 3                 | 4            | 5          |
| r | 1             | 2                   | 3                 | 4            | 5          |
| s | 1             | 2                   | 3                 | 4            | 5          |
| t | 1             | 2                   | 3                 | 4            | 5          |
| u | 1             | 2                   | 3                 | 4            | 5          |
| v | 1             | 2                   | 3                 | 4            | 5          |

**J. ENVIRONMENT QUESTIONS: ALL CASES AND CONTROLS**

*Being an active, productive member of society includes participating in such things as working, going to school, taking care of your home, and being involved with family and friends in social, recreational and civic activities in the community. Many factors can help or improve a person's participation in these activities while other factors can act as barriers and limit participation.*

*First, please tell me how often each of the following has been a barrier to your own participation in the activities that matter to you. Think about the past year, and tell me whether each item on the list below has been a problem daily, weekly, monthly, less than monthly, or never. If the item occurs, then answer the question as to how big a problem the item is with regard to your participation in the activities that matter to you.*

| In the past 12 months how often:                                                                                                | Daily | Weekly | Monthly | Less than monthly | Never | N/A | When problem occurs, has it been a |                |
|---------------------------------------------------------------------------------------------------------------------------------|-------|--------|---------|-------------------|-------|-----|------------------------------------|----------------|
|                                                                                                                                 |       |        |         |                   |       |     | Big problem                        | Little Problem |
| a. has the availability/accessibility of transportation been a problem for you?                                                 | 1     | 2      | 3       | 4                 | 5     | 6   | 1                                  | 2              |
| b. has the natural environment – temperature, terrain, climate – made it difficult to do what you want or need to do?           | 1     | 2      | 3       | 4                 | 5     | 6   | 1                                  | 2              |
| c. have other things in your surroundings – lighting, noise, crowds, etc – made it difficult to do what you want or need to do? | 1     | 2      | 3       | 4                 | 5     | 6   | 1                                  | 2              |
| d. has the information you wanted or needed not been available in a format you can use or understand                            | 1     | 2      | 3       | 4                 | 5     | 6   | 1                                  | 2              |
| e. has the availability of health care services and medical care been a problem for you?                                        | 1     | 2      | 3       | 4                 | 5     | 6   | 1                                  | 2              |
| f. Did you need someone else's help in your home and could not get it easily?                                                   | 1     | 2      | 3       | 4                 | 5     | 6   | 1                                  | 2              |
| g. did you need someone else's help at school or work and could not get it easily?                                              | 1     | 2      | 3       | 4                 | 5     | 6   | 1                                  | 2              |
| h. Have other people's attitudes toward you been a problem at home?                                                             | 1     | 2      | 3       | 4                 | 5     | 6   | 1                                  | 2              |
| i. have other people's attitudes toward you been a problem at school or work?                                                   | 1     | 2      | 3       | 4                 | 5     | 6   | 1                                  | 2              |
| j. did you experience prejudice or discrimination                                                                               | 1     | 2      | 3       | 4                 | 5     | 6   | 1                                  | 2              |
| k. did the policies and rules of businesses and organizations make problems for you?                                            | 1     | 2      | 3       | 4                 | 5     | 6   | 1                                  | 2              |
| l. did government programs and policies make it difficult to do what you want or need to do?                                    | 1     | 2      | 3       | 4                 | 5     | 6   | 1                                  | 2              |
